# Supplementary material for: A first principles study on the stability and electronic and optical properties of 2D SbXY (X = Se/Te and Y = I/Br) Janus layers
Source: Royal Society of Chemistry journal article supplement (doi:10.1039/d4cp04077e), 2024-01-01
Supplement: d4cp04077e1.pdf [file d4cp04077e1.pdf]

Supplement Material for the publication

**First principles study on the stability, electronic and optical  
properties of 2D  
SbXY (X=Se/Te, Y=I/Br) Janus layers**

A.E. Sudheer<sup>a</sup>, Amrendra Kumar<sup>b</sup>, G. Tejaswini<sup>a</sup>,  
M. Vallinayagam<sup>c</sup>, M. Posselt<sup>d</sup>, M. Zschornak<sup>c</sup>, C Kamal<sup>b</sup>, D Murali<sup>\*,a</sup>

<sup>a</sup> Indian Institute of Information Technology Design and Manufacturing Kurnool Andhra Pradesh,  
518007

<sup>b</sup> Theory and Simulations Laboratory, Theoretical and Computational Physics Section, Raja Ramanna  
Centre for Advanced Technology, Indore 452013, India  
Homi Bhabha National Institute, Training School Complex, Mumbai 400094, India

<sup>c</sup> IEP, TU Bergakademie Freiberg, 09599 Freiberg, Germany,  
Faculty of Physics, University of Applied Sciences, Friedrich-List-Platz 1, D-01069 Dresden, Germany

<sup>d</sup> Helmholtz-Zentrum Dresden-Rossendorf, Institute of Ion Beam Physics and Materials Research, 01328  
Dresden, Germany

Email id: \*dmurali@iiitk.ac.in

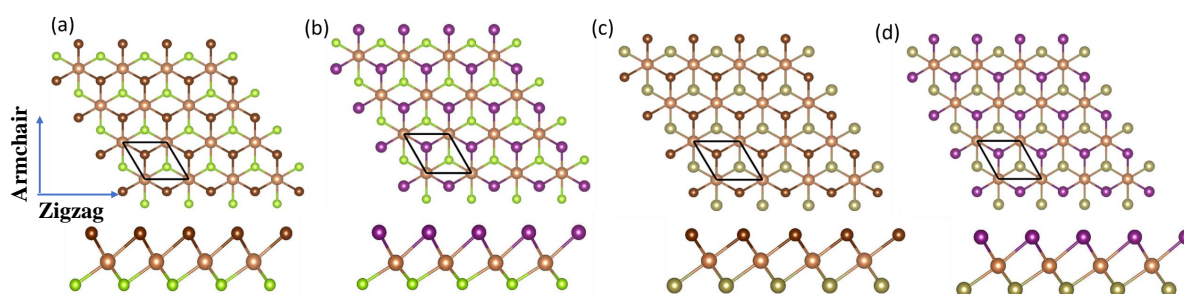

**SFig. 1:** The top and lateral views of geometrically optimized SbSeBr (a), SbSeI (b), SbTeBr (c), SbTeI (d) Janus structures. The golden, brown, violet, green, and bronze colours represent Sb, Br, I, Se, and Te respectively.

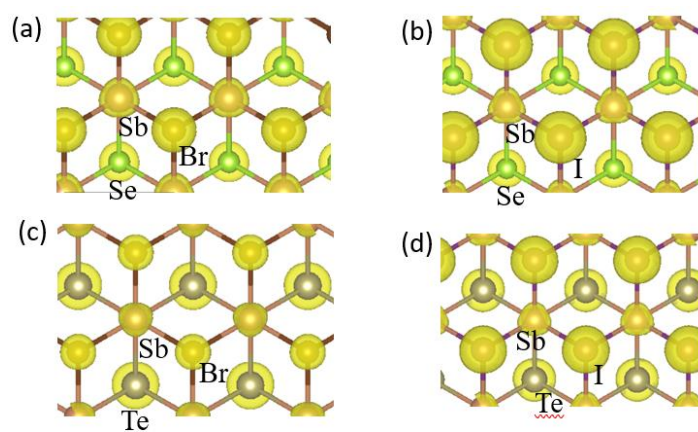

**SFig. 2:** The electron localization function of SbSeBr (a), SbSeI (b), SbTeBr (c), SbTeI (d). The yellow colour represents regions with electron accumulation.

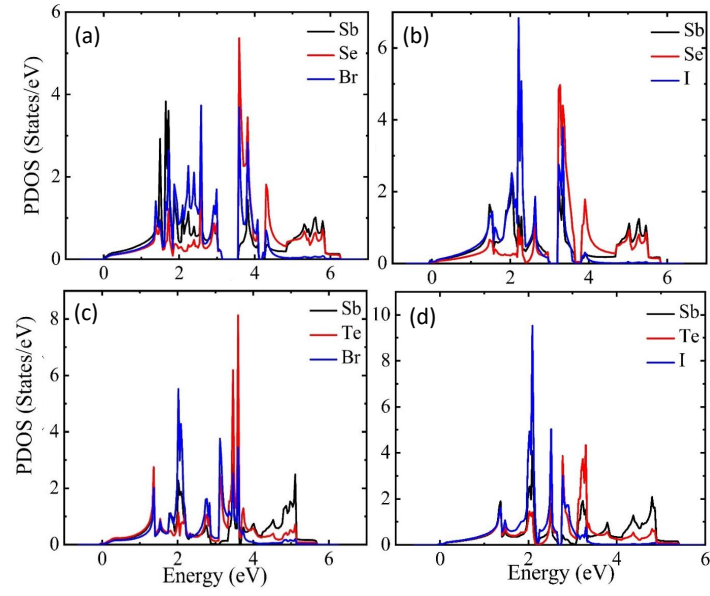

**SFig. 3:** The phonon density of states of SbSeBr (a) SbSeI (b), SbTeBr (c) and SbTeI (d) Janus structures.

**STab. 1:** The calculated elastic constants, Young's modulus, Bulk modulus, and Poisson's ratio of SbXY (X=I/Br, Y=Se/Te) Janus structures.

| Structure | C11 (N/m) | C12 (N/m) | Y (N/m) | B (N/m) | $\nu$ |
|-----------|-----------|-----------|---------|---------|-------|
| SbSeBr    | 34.14     | 10.40     | 30.97   | 22.27   | 0.30  |
| SbSeI     | 33.36     | 11.22     | 29.59   | 22.29   | 0.33  |
| SbTeBr    | 31.58     | 7.82      | 29.64   | 19.70   | 0.24  |
| SbTeI     | 25.29     | 13.47     | 18.11   | 19.38   | 0.53  |

The elastic moduli of the 2D structure like Young's modulus( $Y(\theta)$ ), Poisson's ratio ( $\nu(\theta)$ ) and calculated in dependence on the in-plane polar angle  $\theta$  using the equation given below:

$$Y(\theta) = \frac{C_{11}C_{12} - C_{12}^2}{C_{11}\sin^4\theta + A\sin^2\theta\cos^2\theta + C_{22}\cos^2\theta} \quad (1)$$

$$\nu(\theta) = \frac{C_{12}\sin^4\theta - B\sin^2\theta\cos^2\theta + C_{12}\cos^4\theta}{C_{11}\sin^4\theta - A\sin^2\theta\cos^2\theta + C_{22}\cos^4\theta} \quad (2)$$

where  $A = C_{11}C_{12} - C_{12}^2/(C_{66} - 2C_{12})$  and  $B = C_{11} + C_{22} - (2C_{11}C_{12} - C_{12}^2)/C_{66}$ .

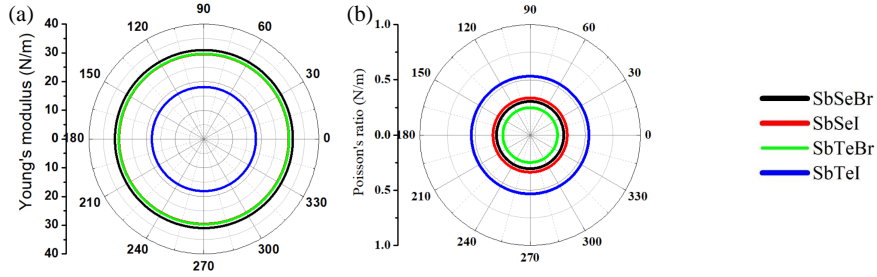

**SFig. 4:** The polar diagram for the in-plane variation (x-y) of Young's modulus and Poisson's ratio of SbXY ( $X=Se/Te$ ,  $Y=Br/I$ ) Janus structures.

**STab. 2:** The calculated total energy of Janus and their parent structures.

| Structure         | Total Energy (eV) |
|-------------------|-------------------|
| SbSeBr            | -10.91            |
| SbSeI             | -10.48            |
| SbTeBr            | -10.40            |
| SbTeI             | -9.98             |
| SbSe <sub>2</sub> | -11.92            |
| SbTe <sub>2</sub> | -10.86            |
| SbBr <sub>2</sub> | -8.39             |
| SbI <sub>2</sub>  | -7.59             |

**STab. 3:** The calculated chemical potential of the ground state of Sb, Se, Te, I and Br is given in the table. The ground state of Sb is found to be in a trigonal (R3m) structure. The chalcogenides Se and Te are in trigonal (P3\_121) structure and the halides I and Br are in orthorhombic (Cmce) structure.

| Material | Crystal system     | Chemical potential(eV) |
|----------|--------------------|------------------------|
| Sb       | Trigonal(R3m)      | -4.43                  |
| I        | Orthorhombic(Cmce) | -1.60                  |
| Br       | Orthorhombic(Cmce) | -1.58                  |
| Te       | Trigonal(P3_121)   | -3.35                  |
| Se       | Trigonal(P3_121)   | -3.66                  |

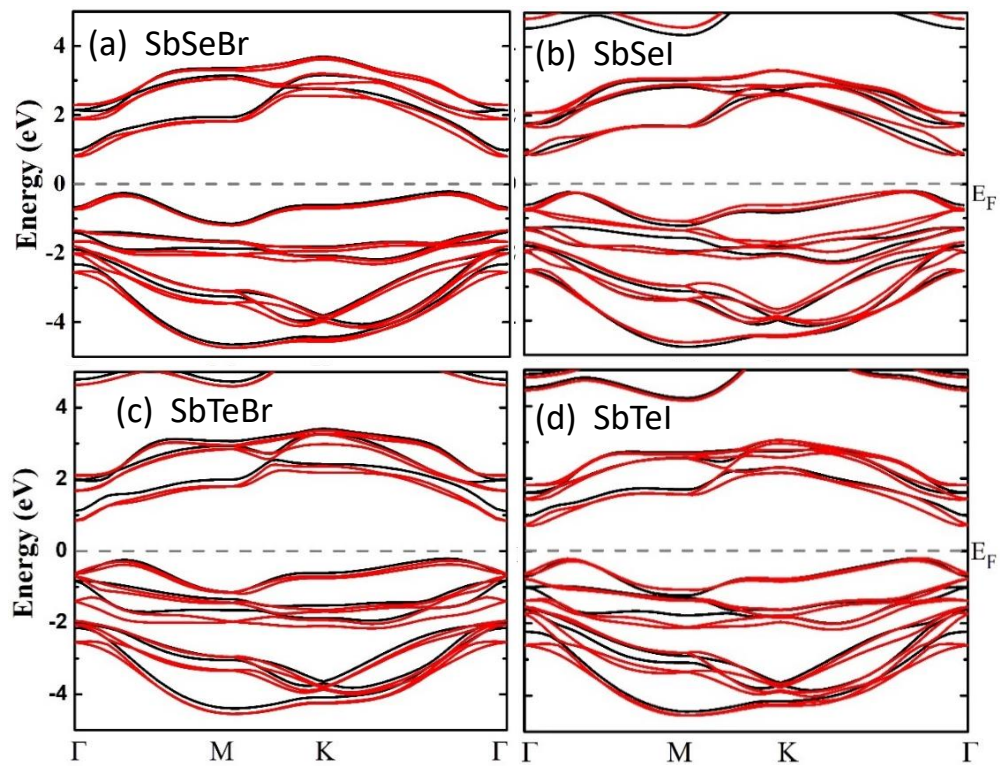

**SFig. 5:** The electronic band structure of SbSeBr (a) SbSeI (b), SbTeBr (c) and SbTeI (d) Janus structures at GGA(black) and GGA+SOC results (red). The dashed line represents Fermi energy level

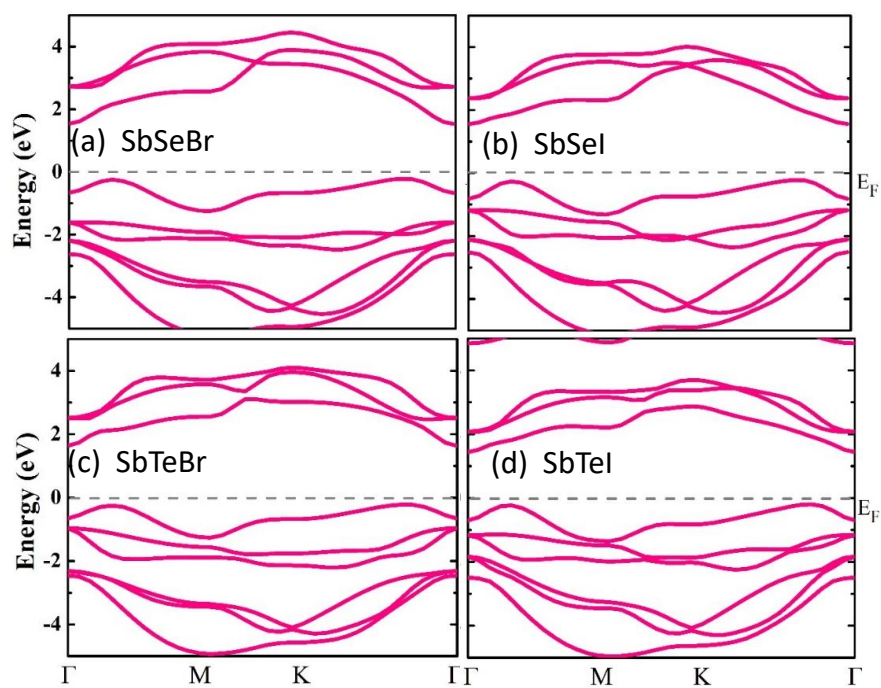

**SFig. 6:** The electronic band structure of SbSeBr (a) SbSeI (b), SbTeBr (c) and SbTeI (d) Janus structures calculated using hybrid functional HSE. The dashed line represents Fermi energy level.

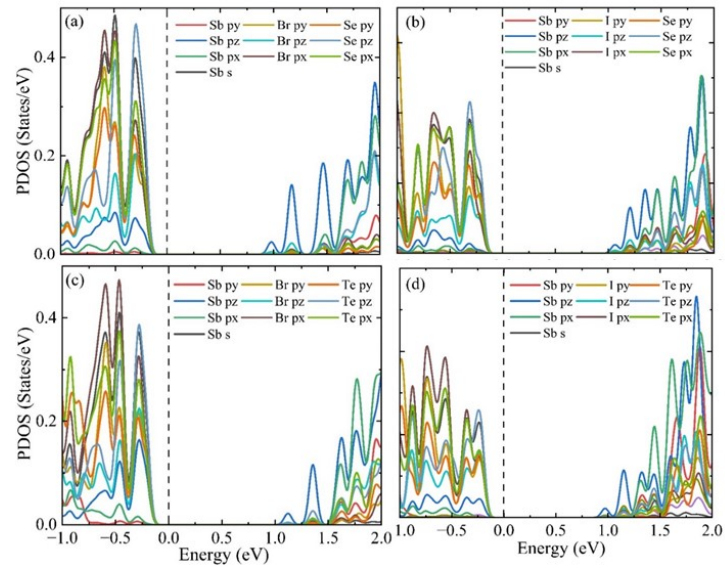

**SFig. 7:** The electronic density of states of SbSeBr (a) SbSeI (b), SbTeBr (c) and SbTeI (d) Janus structures at GGA level.

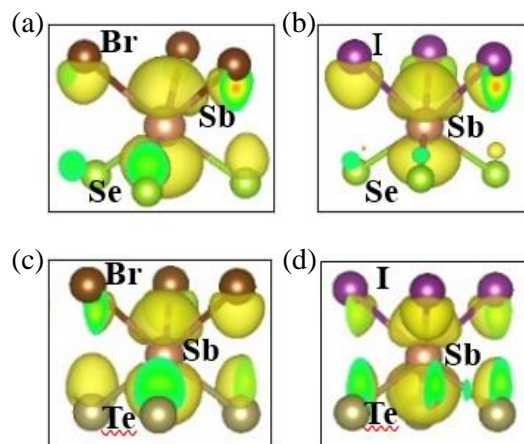

**SFig. 8:** The partial charge density calculated at the CBM of SbSeBr (a) SbSeI (b), SbTeBr (c), and SbTeI (d) Janus structures. The yellow colour represents electron accumulation. The green areas solely denote cross sections of yellow areas with the plane of the picture.

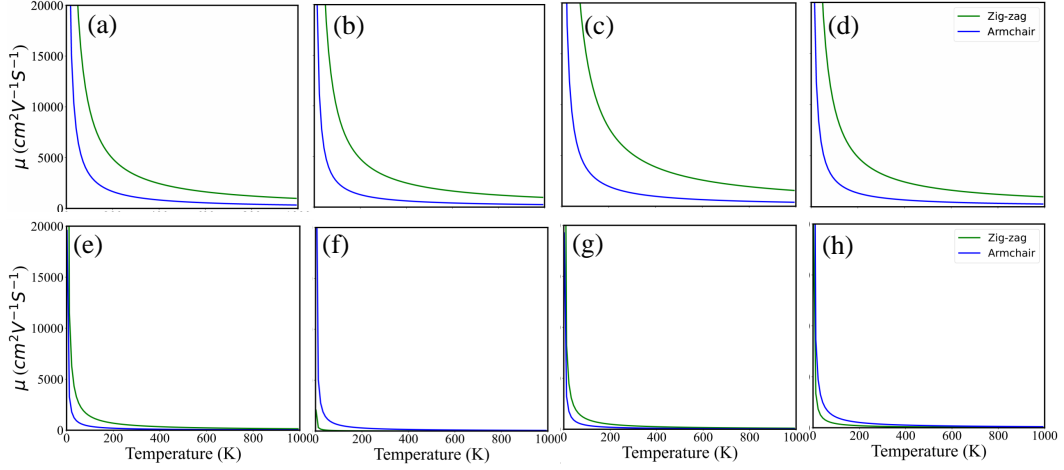

**SFig. 9:** Illustration of mobility variation of charge carriers with temperature. The mobility of electrons and holes in the SbSeBr (a) and (e), SbSeI (b) and (f), SbTeBr (c) and (g), SbTeI (d) and (h) are presented.

**STab. 4:** The excitonic binding energy ( $E_b$ ) calculated along x and y direction and the dielectric constant ( $\epsilon_r$ ) of SbXY Janus structures using classical Mott-Wannier model.

| Structure | $E_b$ (eV) |       | $\epsilon_r$ |
|-----------|------------|-------|--------------|
|           | x          | y     |              |
| SbSeBr    | 0.047      | 0.048 | 3.76         |
| SbSeI     | 0.062      | 0.042 | 4.32         |
| SbTeBr    | 0.036      | 0.036 | 4.26         |
| SbTeI     | 0.044      | 0.036 | 4.89         |
